# Supplementary material for: Atom-economical synthesis of γ-valerolactone with self-supplied hydrogen from methanol
Source: Royal Society of Chemistry journal article supplement (doi:10.1039/c5cc06669g), 2015-01-01
Supplement: c5cc06669g1.pdf [file c5cc06669g1.pdf]

# 1 Atom-economical synthesis of $\gamma$ -valerolactone with self- 2 supplied hydrogen from methanol

3

4 Zheng Li, Xing Tang, Yetao Jiang, Yanjun Wang, Miao Zuo, Wei Chen, Xianhai Zeng\*, Yong  
5 Sun and Lu Lin\*

6 College of Energy, Xiamen University, Xiamen 361102, China

7 Email: [xianhai.zeng@xmu.edu.cn](mailto:xianhai.zeng@xmu.edu.cn), [lulin@xmu.edu.cn](mailto:lulin@xmu.edu.cn)

8

## 9 Supporting information

### 10 Experimental Section

#### 11 Materials

12 All chemicals were analytical reagents and purchased from Sinopharm Chemical  
13 Reagent Co., Ltd., China.

14 Cu-Cr catalyst was prepared by impregnation method.  $\text{CuSO}_4$  (99%) and  $(\text{NH}_4)_2\text{Cr}_2\text{O}_7$   
15 (99%) with a mole ratio of 2:1 were mixed in water and stirred at room temperature.  
16 Then an equivalent amount of ammonium hydroxide (10 wt%) was slowly added to  
17 the solvent. The system was then aged at 45 °C for 4 h followed by filtrating and a  
18 brown solid precursor was obtained. The precursor was vacuum dried at 70 °C  
19 overnight, calcined at 350 °C for 4 h and then stored in a desiccator. Chromium (VI)  
20 in Cu-Cr precursor was totally reduced to Chromium (III) during calcination.

21

#### 22 Reaction

23 In a typical experiment, 17.5 g ML (99%) and 1.25 g MeOH was added to a 100 mL  
24 stainless steel reactor (Parr, USA) accompanied by 0.35 g catalyst. The weight of the  
25 reactor with reactant was recorded before reaction. The reactor was then sealed by  $\text{N}_2$   
26 and heated to 250 °C within 25 min. The reaction time was started recorded as soon as  
27 the system reached working temperature. The stirring rate was 500 rpm.

28 After reaction, the system was quickly cooled down to room temperature and the  
29 gaseous product was collected by an aluminium foil bag for GC analysis. Then the  
30 reactor was weighted again to calculate the mass change during the reaction. The  
31 liquid product was separated with used catalyst by filtration and stored for later  
32 analysis. The catalyst was washed by ethanol and stored in a vacuum drying oven for  
33 subsequent characterization.

34 For the recycle experiments, the used catalysts was separated from the liquid product,  
35 washed by ethanol and then stored in a vacuum drying oven at room temperature. The  
36 recycled catalyst was directly used without any calcination or hydrogenation process.

37

## 38 Characterization

39 The component of gaseous product was analyzed with a Shimadzu GC-2010  
40 instrument equipped with an Agilent CP-7429 column and a TCD.

41 The liquid product was diluted with ethanol and quantitatively analyzed by a  
42 Thermofisher Trace 1300 & ISQ LT GC-MS instrument with an TR-5MS column  
43 (15.0 m × 250 μm × 0.25 μm). The following programmed temperature was used in  
44 the analysis: 313 K (2 min) – 10 K/min – 553 K (2 min). The carrier gas was He with  
45 a flow rate of 1.2 mL min<sup>-1</sup> and the split ratio was 1:50. The mass spectra were  
46 obtained by electron impact ionization (EI), at an electron energy of 70 eV and with a  
47 25 μA emission current.

48 External standard method was applied to measure the mass of GVL and unreacted ML  
49 in the product.  $C_{ML}$  and  $S_{GVL}$  were calculated as the following equations.

$$50 \quad C_{ML} (\%) = \left( 1 - \frac{m_{ML}}{n_{ML\_initial}} \right) \times 100\%$$

$$51 \quad S_{GVL} (\%) = \left( \frac{m_{GVL}}{m_{ML\_initial} - m_{mL}} \right) \times 100\%$$

52 XRD spectra of catalyst was acquired on a Rigaku Ultima IV X-ray diffractometer  
53 with Ni-filtered Cu K radiation operated at 40 kV and 30 mA. The data was collected  
54 from  $2\theta=10^\circ$  to  $90^\circ$  with a scan rate of  $10^\circ \text{ min}^{-1}$ .

55 SEM-EDX analysis was carried out by a Zeiss Sigma OXFORD X-Max scanning  
56 electron microscope with an accelerating voltage of 15 kV.

57 TEM images was acquired on a JEOL 1400 transmission electron microscopy with an  
58 accelerating voltage of 100 kV.

59 CHN elemental analysis was performed on a Vario EL III instrument.

60 BET surface area and BJH adsorption curves were measured on a Micromeritics  
61 ASAP 2020 physisorption apparatus. The samples (about 500 mg) were degassed at  
62 363 K for 4 h in a vacuum before N<sub>2</sub> adsorption.

63 ICP-MS experiment was conducted on a HP/AGILENT 4500 instrument. Considering  
64 that only aqueous sample could be tested, the liquid product containing GVL and  
65 methanol was filtrated twice by filter membrane (220 nm) and then combusted in a  
66 crucible. Then 10 mL 10 wt% HNO<sub>3</sub> was added to the vessel and stirred for 4 h. The  
67 solvent was then filtrated twice by filter membrane (220 nm) and diluted to pH=1  
68 before testing.

69

70 **Supplementary tables and figures**

71

72 **Table S1.** The equivalent ratio of H-donor and substrate for GVL production in recent reports

| Substrate        | H-donor             | H-donor:substrate<br>Ratio | Catalytic conditions       | Ref.      |
|------------------|---------------------|----------------------------|----------------------------|-----------|
| 26.4 mmol LA     | H <sub>2</sub>      | 3.3 <sup>a</sup>           | Homo, in 40 ml water       | 1         |
| 8.6 mmol LA      | H <sub>2</sub>      | 2.0 <sup>a</sup>           | Hetero, in 15 ml water     | 2         |
| 8.8 mmol LA      | H <sub>2</sub>      | 6.1 <sup>a</sup>           | Hetero, in 5 ml water      | 3         |
| 43.1 mmol LA     | H <sub>2</sub>      | 6.4 <sup>a</sup>           | Hetero, in 95 ml water     | 4         |
| 20.0 mmol LA     | H <sub>2</sub>      | 2.8 <sup>a</sup>           | Hetero, solvent-free, 24 h | 5         |
| 13.7 mmol EL     | EtOH <sup>b</sup>   | 60.3                       | Hetero, in 38 g EtOH       | 6, 7      |
| 1.0 mmol LA      | 2-PrOH <sup>b</sup> | 65.4                       | Hetero, in 5 ml 2-PrOH     | 8         |
| 1.0 mmol EL      | 2-PrOH <sup>b</sup> | 26.2                       | Hetero, in 2 ml 2-PrOH     | 9         |
| 0.34 mmol ML     | 2-BuOH <sup>b</sup> | 24.1                       | Hetero, in 0.75 ml 2-BuOH  | 10        |
| 200.0 mmol LA    | FA <sup>c</sup>     | 1.0                        | Homo, in 25 ml water, 12 h | 11        |
| 18.0 mmol LA     | FA <sup>c</sup>     | 1.0                        | Hetero, in 40 ml water     | 12        |
| 4.0 mmol ML      | MeOH <sup>c</sup>   | 158.4 <sup>d</sup>         | Hetero, in 19.5 g MeOH     | 13        |
| 134.6 mmol<br>ML | MeOH <sup>c</sup>   | 0.29 <sup>d</sup>          | Hetero, solvent-free       | This work |

73 a: calculated by high pressure gas state equation. b: MPV transfer hydrogenation. c: in-situ hydrogen supplied by  
 74 decomposition of H-donor. d: the mole ratio of MeOH:ML.

75

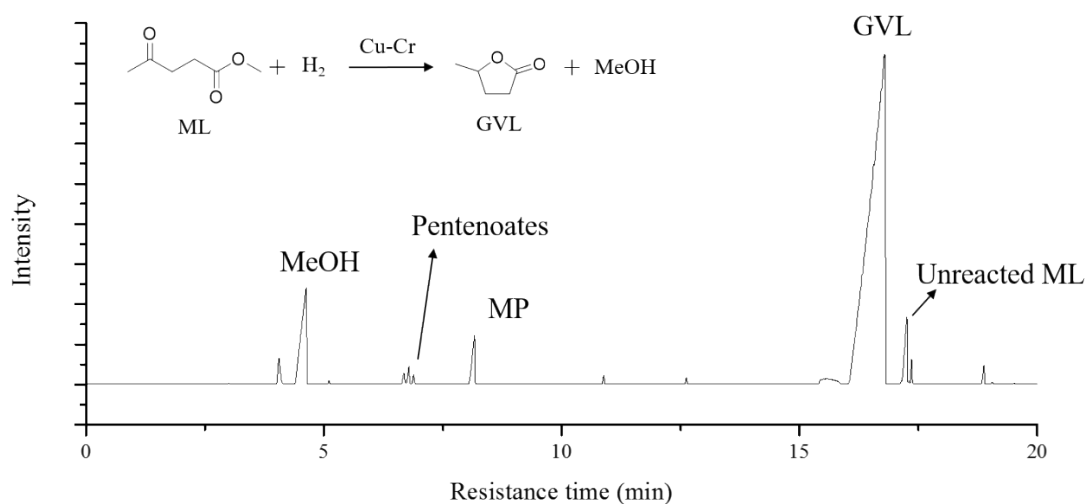

76

77 **Figure S1.** Product distribution of Cu-Cr catalyzed hydrogenation of ML in external H<sub>2</sub> (Table 1, Entry 1) detected  
 78 by GC. The amount of MeOH was less than GVL because some MeOH was decomposed during the reaction and,  
 79 evaporated during the vacuum filtration process.

80

81

82 **Table S2.** Effect of catalyst on the reaction

| Catalyst | C <sub>ML</sub> (%) | S <sub>GVL</sub> (%) | Δ <sub>m</sub> (g) |
|----------|---------------------|----------------------|--------------------|
| Typical  | 93.5                | 96.1                 | 2.1                |

|                                |      |      |     |
|--------------------------------|------|------|-----|
| CuO                            | 15.2 | 25.6 | 0.5 |
| Cr <sub>2</sub> O <sub>3</sub> | 10.5 | 0    | 0.1 |
| Blank                          | 0    | -    | 0.1 |
| Blank <sup>a</sup>             | 3.2  | 95.0 | -   |

83 Typical reaction conditions: 17.5 g ML, 1.25 g MeOH, 0.35 g catalyst (2 wt% of ML), 250 °C, N<sub>2</sub> (1 bar), 500 rpm, 4 h. a: 20 g  
 84 ML, 4 MPa H<sub>2</sub>, no MeOH added.

85

86

87 **Table S3.** Composition of gaseous product in a typical reaction

| Composition     | H <sub>2</sub> | O <sub>2</sub> | N <sub>2</sub> | CH <sub>4</sub> | CO   | CO <sub>2</sub> |
|-----------------|----------------|----------------|----------------|-----------------|------|-----------------|
| Content (v/v %) | 9.6            | -              | 15.4           | 1.6             | 38.9 | 33.5            |

88

89

90 **Table S4.** Metal concentration in the product detected by ICP-MS

| Entry                      | Concentration of Cu (µg/cm <sup>3</sup> ) | Concentration of Cr (µg/cm <sup>3</sup> ) |
|----------------------------|-------------------------------------------|-------------------------------------------|
| Product (Table 1, Entry 7) | 1.1                                       | ND                                        |

91

92

93 **Table S5.** Effect of impurities on the reaction

| Conditions               | C <sub>ML</sub> (%) | S <sub>GVL</sub> (%) | Δ <sub>m</sub> <sup>c</sup> (g) |
|--------------------------|---------------------|----------------------|---------------------------------|
| Typical                  | 93.5                | 96.1                 | 2.1                             |
| N <sub>2</sub> (2 MPa)   | 34.2                | 39.4                 | 1.3                             |
| Air (0.1 MPa)            | 93.5                | 86.1                 | 2.1                             |
| O <sub>2</sub> (0.1 MPa) | 15.5                | 48.7                 | 0.4                             |
| Water (0.2 g)            | 21.0                | 51.5                 | 0.7                             |

94 Typical reaction conditions: 17.5 g ML, 1.25 g MeOH, 0.35 g catalyst (2 wt% of ML), 250 °C, N<sub>2</sub> (1 bar), 500 rpm, 4 h.

95

96

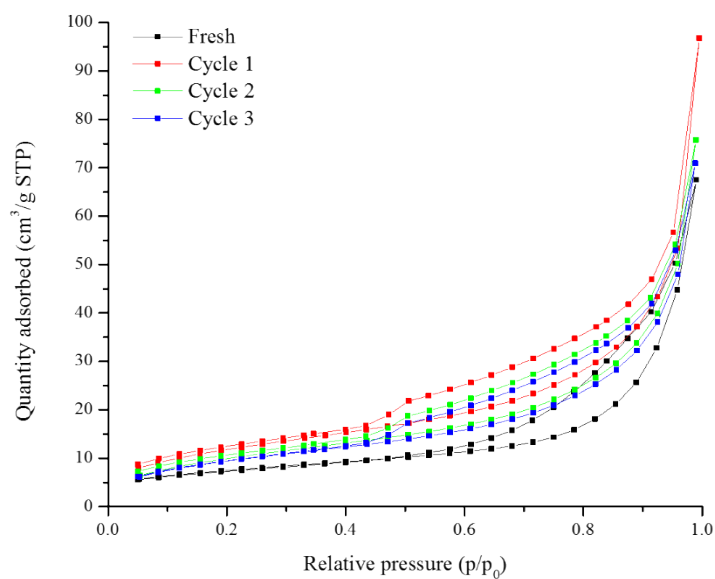

97

98 **Figure S2.** Isotherms of fresh and used catalysts

99

100

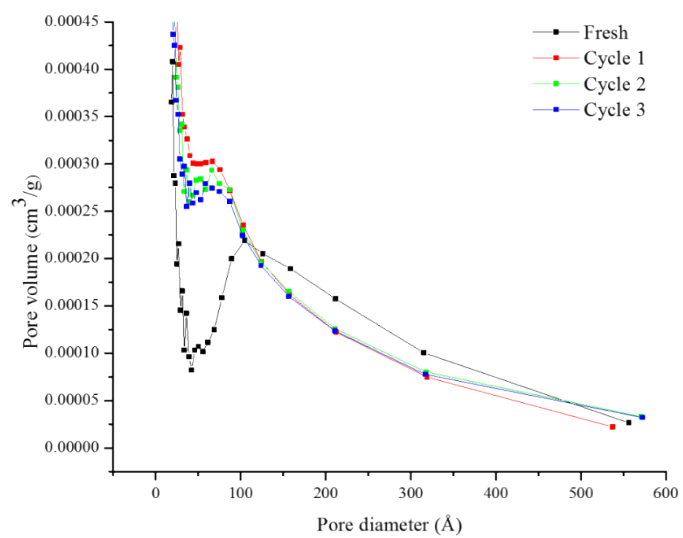

101

102 **Figure S3.** BJH adsorption profiles of fresh and used catalysts

103

104

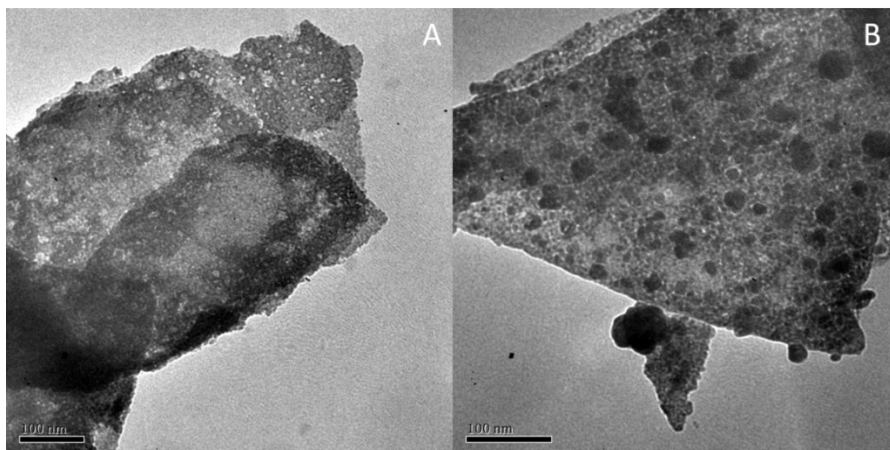

105  
 106 **Figure S4.** TEM images of: A) fresh Cu-Cr catalyst; B) in-situ reduced catalyst after 1 cycle.  
 107  
 108

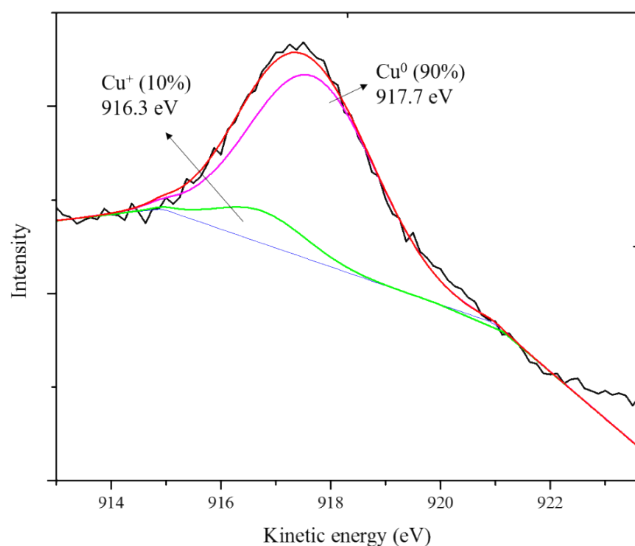

109  
 110 **Figure S5.** Cu LMM spectrum of in-situ reduced Cu-Cr catalyst  
 111

112

113 **References:**

- 114 1. C. Delhomme, L. Schaper, P. M. Zhang, S. G. Raudaschl, B. D. Weuster and F. E. Kühn, *J. Organomet.*  
 115 *Chem.*, 2013, **724**, 297-299.  
 116 2. C. Ortiz-Cervantes and J. J. García, *Inor. Chim. Acta*, 2013, **397**, 124-128.  
 117 3. K. Yan and A. Chen, *Energy*, 2013, **58**, 357-363.  
 118 4. A. M. Hengne and C. V. Rode, *Green Chem.*, 2012, **14**, 1064.  
 119 5. K. Shimizu, S. Kanno and K. Kon, *Green Chem.*, 2014, **16**, 3899.  
 120 6. X. Tang, L. Hu, Y. Sun, G. Zhao, W. Hao and L. Lin, *RSC Adv.*, 2013, **3**, 10277.  
 121 7. X. Tang, H. Chen, L. Hu, W. Hao, Y. Sun, X. Zeng, L. Lin and S. Liu, *Appl. Catal., B*, 2014, **147**, 827-  
 122 834.  
 123 8. J. Wang, S. Jaenicke and G.-K. Chuah, *RSC Adv.*, 2014, **4**, 13481.  
 124 9. Z. Yang, Y. B. Huang, Q. X. Guo and Y. Fu, *Chem. Commun. (Camb)*, 2013, **49**, 5328-5330.  
 125 10. L. Bui, H. Luo, W. R. Gunther and Y. Roman-Leshkov, *Angew. Chem. Int. Ed. Engl.*, 2013, **52**, 8022-

- 126 8025.
- 127 11. L. Deng, J. Li, D. M. Lai, Y. Fu and Q. X. Guo, *Angew. Chem. Int. Ed. Engl.*, 2009, **48**, 6529-6532.
- 128 12. J. H. Yuan, S. Li, L. Yu, Y. Liu, Y. Cao, H. Y. He and K. N. Fan, *Energy Environ. Sci.*, 2013, **6**, 3308-  
129 3313.
- 130 13. X. Tang, Z. Li, X. Zeng, Y. Jiang, S. Liu, T. Lei, Y. Sun and L. Lin, *ChemSusChem*, 2015, **8**, 1601-1607.
- 131
